# Supplementary material for: Hospital Stay as a Proxy Indicator for Severe Injury in Earthquakes: A Retrospective Analysis
Source: PLoS One. 2013 Apr 9;8(4):e61371. doi: 10.1371/journal.pone.0061371 (PMC3621831; doi:10.1371/journal.pone.0061371)
Supplement: Table S1 — Complete reference over all ROC analyses. (XLSX) [file pone.0061371.s002.xlsx]

## Sheet: Sheet1
File description: This file contain all ROC-analyses for the LOSINJ study
Patient group (group code)	Included/Excluded (group code)	Reference variable (STATA variable name)	ROC-number	Number of observations included in analysis	AUC	Standard error for AUC	Lower bound of CI for AUC	Upper bound of CI for AUC
All ages, both sexes (1)	Included only (1)	Severly injured (sevinj)	1	1496	0.621822	0.0143424	0.593711	0.649933
		Severly injured sensitvity 1 (sevinj_sens1)	2	1496	0.639612	0.0157932	0.608658	0.670566
		Severly injured sensitvity 2 (sevinj_sens2)	3	1496	0.619891	0.0143603	0.591745	0.648036
		Severly injured sensitvity 3 (sevinj_sens3)	4	1496	0.646985	0.0157427	0.61613	0.67784
		Resource use (resuse)	5	1496	0.611537	0.0144064	0.583301	0.639773
		Resource use sensitivity 1 (resuse_sens1)	6	1496	0.692743	0.025776	0.642223	0.743263
		Resource use sensitivity 2 (resuse_sens2)	7	1496	0.610859	0.0144105	0.582615	0.639103
		Resource use sensitivity 3 (resuse_sens3)	8	1496	0.718808	0.0526979	0.615522	0.822094
		Serious injury (icisssev)	9	1496	0.635025	0.0159706	0.603723	0.666327
	Included + Excluded, coding (2)	Severly injured (sevinj)	10	1548	0.620002	0.0141364	0.592295	0.647709
		Severly injured sensitvity 1 (sevinj_sens1)	11	1548	0.637399	0.0154713	0.607076	0.667723
		Severly injured sensitvity 2 (sevinj_sens2)	12	1548	0.619388	0.0141398	0.591674	0.647101
		Severly injured sensitvity 3 (sevinj_sens3)	13	1548	0.643774	0.0155685	0.61326	0.674288
		Resource use (resuse)	14	1548	0.612924	0.0141488	0.585193	0.640656
		Resource use sensitivity 1 (resuse_sens1)	15	1548	0.691145	0.0240018	0.644103	0.738188
		Resource use sensitivity 2 (resuse_sens2)	16	1548	0.612464	0.0141459	0.584738	0.640189
		Resource use sensitivity 3 (resuse_sens3)	17	1548	0.750116	0.0467733	0.658442	0.84179
		Serious injury (icisssev)	18	1548	0.628627	0.0158304	0.5976	0.659654
	Included + Excluded, dead and transfer (3)	Severly injured (sevinj)	19	1826	0.58171	0.013362	0.555521	0.607899
		Severly injured sensitvity 1 (sevinj_sens1)	20	1826	0.580512	0.014955	0.551201	0.609823
		Severly injured sensitvity 2 (sevinj_sens2)	21	1826	0.58065	0.0133666	0.554452	0.606848
		Severly injured sensitvity 3 (sevinj_sens3)	22	1826	0.586663	0.0148675	0.557523	0.615803
		Resource use (resuse)	23	1826	0.568116	0.0133273	0.541995	0.594237
		Resource use sensitivity 1 (resuse_sens1)	24	1826	0.597316	0.0248501	0.548611	0.646021
		Resource use sensitivity 2 (resuse_sens2)	25	1826	0.567533	0.0133316	0.541404	0.593663
		Resource use sensitivity 3 (resuse_sens3)	26	1826	0.525925	0.0397091	0.448096	0.603753
		Serious injury (icisssev)	27	1826	0.579164	0.0151763	0.549419	0.608909
	All (4)	Severly injured (sevinj)	28	1878	0.581468	0.0131913	0.555613	0.607322
		Severly injured sensitvity 1 (sevinj_sens1)	29	1878	0.582464	0.0146344	0.553781	0.611147
		Severly injured sensitvity 2 (sevinj_sens2)	30	1878	0.581445	0.0131901	0.555593	0.607297
		Severly injured sensitvity 3 (sevinj_sens3)	31	1878	0.584909	0.0146939	0.556109	0.613708
		Resource use (resuse)	32	1878	0.570907	0.0131273	0.545178	0.596636
		Resource use sensitivity 1 (resuse_sens1)	33	1878	0.611599	0.0231641	0.566198	0.657
		Resource use sensitivity 2 (resuse_sens2)	34	1878	0.570443	0.0131292	0.54471	0.596176
		Resource use sensitivity 3 (resuse_sens3)	35	1878	0.554328	0.0387785	0.478324	0.630332
		Serious injury (icisssev)	36	1878	0.574744	0.0150111	0.545323	0.604165
All ages, males (2)	Included only	Severly injured (sevinj)	37	741	0.624242	0.0203696	0.584318	0.664165
		Severly injured sensitvity 1 (sevinj_sens1)	38	741	0.649051	0.0217561	0.60641	0.691692
		Severly injured sensitvity 2 (sevinj_sens2)	39	741	0.622971	0.0203809	0.583025	0.662917
		Severly injured sensitvity 3 (sevinj_sens3)	40	741	0.657864	0.0216192	0.615491	0.700237
		Resource use (resuse)	41	741	0.607062	0.0205411	0.566802	0.647322
		Resource use sensitivity 1 (resuse_sens1)	42	741	0.677567	0.0357342	0.60753	0.747605
		Resource use sensitivity 2 (resuse_sens2)	43	741	0.605834	0.0205631	0.565531	0.646137
		Resource use sensitivity 3 (resuse_sens3)	44	741	0.732511	0.0786959	0.57827	0.886752
		Serious injury (icisssev)	45	741	0.650906	0.0217721	0.608233	0.693578
	Included + Excluded, coding	Severly injured (sevinj)	46	764	0.623108	0.0201082	0.583697	0.662519
		Severly injured sensitvity 1 (sevinj_sens1)	47	764	0.646644	0.021407	0.604687	0.6886
		Severly injured sensitvity 2 (sevinj_sens2)	48	764	0.621895	0.0201178	0.582465	0.661326
		Severly injured sensitvity 3 (sevinj_sens3)	49	764	0.649101	0.0216158	0.606735	0.691467
		Resource use (resuse)	50	764	0.610858	0.0201753	0.571315	0.650401
		Resource use sensitivity 1 (resuse_sens1)	51	764	0.679122	0.0330252	0.614394	0.74385
		Resource use sensitivity 2 (resuse_sens2)	52	764	0.60741	0.0202215	0.567776	0.647043
		Resource use sensitivity 3 (resuse_sens3)	53	764	0.758982	0.0713589	0.619121	0.898843
		Serious injury (icisssev)	54	764	0.642239	0.0217776	0.599556	0.684923
	Included + Excluded, dead and transfer	Severly injured (sevinj)	55	913	0.581365	0.0189515	0.544221	0.618509
		Severly injured sensitvity 1 (sevinj_sens1)	56	913	0.576596	0.0208048	0.53582	0.617373
		Severly injured sensitvity 2 (sevinj_sens2)	57	913	0.581165	0.0189546	0.544014	0.618315
		Severly injured sensitvity 3 (sevinj_sens3)	58	913	0.584653	0.0206728	0.544135	0.62517
		Resource use (resuse)	59	913	0.560244	0.0189012	0.523198	0.597289
		Resource use sensitivity 1 (resuse_sens1)	60	913	0.587811	0.0322661	0.52457	0.651051
		Resource use sensitivity 2 (resuse_sens2)	61	913	0.559155	0.0189098	0.522092	0.596217
		Resource use sensitivity 3 (resuse_sens3)	62	913	0.545403	0.0577105	0.432293	0.658513
		Serious injury (icisssev)	63	913	0.579393	0.0211272	0.537985	0.620802
	All	Severly injured (sevinj)	64	936	0.581643	0.018737	0.54492	0.618367
		Severly injured sensitvity 1 (sevinj_sens1)	65	936	0.578859	0.0204	0.538875	0.618842
		Severly injured sensitvity 2 (sevinj_sens2)	66	936	0.581453	0.01874	0.544723	0.618183
		Severly injured sensitvity 3 (sevinj_sens3)	67	936	0.578546	0.0205236	0.538321	0.618772
		Resource use (resuse)	68	936	0.564719	0.0186402	0.528185	0.601253
		Resource use sensitivity 1 (resuse_sens1)	69	936	0.600199	0.0304449	0.540528	0.65987
		Resource use sensitivity 2 (resuse_sens2)	70	936	0.561778	0.0186597	0.525206	0.59835
		Resource use sensitivity 3 (resuse_sens3)	71	936	0.56691	0.0568504	0.455485	0.678335
		Serious injury (icisssev)	72	936	0.573528	0.0209689	0.53243	0.614627
All ages, females (3)	Included only	Severly injured (sevinj)	73	755	0.619338	0.020229	0.57969	0.658987
		Severly injured sensitvity 1 (sevinj_sens1)	74	755	0.630555	0.0228609	0.585749	0.675362
		Severly injured sensitvity 2 (sevinj_sens2)	75	755	0.616794	0.0202665	0.577072	0.656516
		Severly injured sensitvity 3 (sevinj_sens3)	76	755	0.636595	0.0228249	0.59186	0.681331
		Resource use (resuse)	77	755	0.615851	0.0202468	0.576168	0.655534
		Resource use sensitivity 1 (resuse_sens1)	78	755	0.71239	0.037173	0.639532	0.785247
		Resource use sensitivity 2 (resuse_sens2)	79	755	0.615722	0.0202389	0.576055	0.65539
		Resource use sensitivity 3 (resuse_sens3)	80	755	0.70898	0.0719338	0.567992	0.849967
		Serious injury (icisssev)	81	755	0.62001	0.0232592	0.574423	0.665597
	Included + Excluded, coding	Severly injured (sevinj)	82	784	0.616898	0.019907	0.577881	0.655915
		Severly injured sensitvity 1 (sevinj_sens1)	83	784	0.62856	0.0223112	0.58483	0.672289
		Severly injured sensitvity 2 (sevinj_sens2)	84	784	0.616872	0.0199079	0.577853	0.655891
		Severly injured sensitvity 3 (sevinj_sens3)	85	784	0.638857	0.0223578	0.595037	0.682678
		Resource use (resuse)	86	784	0.614825	0.0198825	0.575856	0.653794
		Resource use sensitivity 1 (resuse_sens1)	87	784	0.705325	0.0353147	0.636109	0.77454
		Resource use sensitivity 2 (resuse_sens2)	88	784	0.617244	0.0198317	0.578375	0.656113
		Resource use sensitivity 3 (resuse_sens3)	89	784	0.7446	0.0627524	0.621607	0.867592
		Serious injury (icisssev)	90	784	0.615834	0.0228912	0.570968	0.6607
	Included + Excluded, dead and transfer	Severly injured (sevinj)	91	912	0.580732	0.0188907	0.543707	0.617757
		Severly injured sensitvity 1 (sevinj_sens1)	92	912	0.58315	0.0216022	0.540811	0.62549
		Severly injured sensitvity 2 (sevinj_sens2)	93	912	0.578785	0.0189017	0.541739	0.615832
		Severly injured sensitvity 3 (sevinj_sens3)	94	912	0.587477	0.0214766	0.545384	0.62957
		Resource use (resuse)	95	912	0.574683	0.0188369	0.537764	0.611603
		Resource use sensitivity 1 (resuse_sens1)	96	912	0.607674	0.0395803	0.530098	0.68525
		Resource use sensitivity 2 (resuse_sens2)	97	912	0.574633	0.0188397	0.537708	0.611558
		Resource use sensitivity 3 (resuse_sens3)	98	912	0.510905	0.0548898	0.403323	0.618487
		Serious injury (icisssev)	99	912	0.57777	0.0218854	0.534875	0.620664
	All	Severly injured (sevinj)	100	941	0.580041	0.018621	0.543544	0.616537
		Severly injured sensitvity 1 (sevinj_sens1)	101	941	0.584832	0.0210899	0.543497	0.626168
		Severly injured sensitvity 2 (sevinj_sens2)	102	941	0.580164	0.0186159	0.543678	0.616651
		Severly injured sensitvity 3 (sevinj_sens3)	103	941	0.590249	0.0211149	0.548864	0.631633
		Resource use (resuse)	104	941	0.575776	0.0185323	0.539453	0.612099
		Resource use sensitivity 1 (resuse_sens1)	105	941	0.624071	0.0361275	0.553263	0.69488
		Resource use sensitivity 2 (resuse_sens2)	106	941	0.577789	0.0185151	0.5415	0.614078
		Resource use sensitivity 3 (resuse_sens3)	107	941	0.54504	0.0532553	0.440662	0.649419
		Serious injury (icisssev)	108	941	0.574906	0.0215657	0.532639	0.617174
0-14, both sexes (4)	Included only	Severly injured (sevinj)	109	153	0.601648	0.0464365	0.510634	0.692662
		Severly injured sensitvity 1 (sevinj_sens1)	110	153	0.570243	0.0526999	0.466953	0.673533
		Severly injured sensitvity 2 (sevinj_sens2)	111	153	0.582975	0.0469671	0.490921	0.675029
		Severly injured sensitvity 3 (sevinj_sens3)	112	153	0.572566	0.0527869	0.469106	0.676027
		Resource use (resuse)	113	153	0.626473	0.0484587	0.531496	0.72145
		Resource use sensitivity 1 (resuse_sens1)	114	153	0.65522	0.0843497	0.489897	0.820542
		Resource use sensitivity 2 (resuse_sens2)	115	153	0.606756	0.0493842	0.509965	0.703547
		Resource use sensitivity 3 (resuse_sens3)	116	153	0.646825	0.130314	0.391414	0.902237
		Serious injury (icisssev)	117	153	0.561135	0.0548434	0.453644	0.668626
	Included + Excluded, coding	Severly injured (sevinj)	118	155	0.611865	0.0458281	0.522043	0.701686
		Severly injured sensitvity 1 (sevinj_sens1)	119	155	0.577771	0.0524277	0.475014	0.680527
		Severly injured sensitvity 2 (sevinj_sens2)	120	155	0.593826	0.0463938	0.502896	0.684756
		Severly injured sensitvity 3 (sevinj_sens3)	121	155	0.580017	0.0524971	0.477125	0.682909
		Resource use (resuse)	122	155	0.639116	0.0475714	0.545878	0.732354
		Resource use sensitivity 1 (resuse_sens1)	123	155	0.677305	0.0819073	0.516769	0.83784
		Resource use sensitivity 2 (resuse_sens2)	124	155	0.620463	0.048531	0.525344	0.715582
		Resource use sensitivity 3 (resuse_sens3)	125	155	0.693533	0.120822	0.456727	0.930339
		Serious injury (icisssev)	126	155	0.554272	0.0546174	0.447224	0.66132
	Included + Excluded, dead and transfer	Severly injured (sevinj)	127	203	0.560668	0.0404286	0.481429	0.639906
		Severly injured sensitvity 1 (sevinj_sens1)	128	203	0.531637	0.043846	0.4457	0.617573
		Severly injured sensitvity 2 (sevinj_sens2)	129	203	0.547057	0.0406255	0.467432	0.626682
		Severly injured sensitvity 3 (sevinj_sens3)	130	203	0.537373	0.0434134	0.452284	0.622461
		Resource use (resuse)	131	203	0.568069	0.0415433	0.486645	0.649492
		Resource use sensitivity 1 (resuse_sens1)	132	203	0.607428	0.0628149	0.484313	0.730543
		Resource use sensitivity 2 (resuse_sens2)	133	203	0.554426	0.0420173	0.472073	0.636778
		Resource use sensitivity 3 (resuse_sens3)	134	203	0.601215	0.0786586	0.447047	0.755383
		Serious injury (icisssev)	135	203	0.529989	0.0454215	0.440964	0.619013
	All	Severly injured (sevinj)	136	205	0.567879	0.0401253	0.489235	0.646523
		Severly injured sensitvity 1 (sevinj_sens1)	137	205	0.535871	0.0436721	0.450275	0.621467
		Severly injured sensitvity 2 (sevinj_sens2)	138	205	0.554598	0.0403405	0.475532	0.633664
		Severly injured sensitvity 3 (sevinj_sens3)	139	205	0.541355	0.0432339	0.456618	0.626092
		Resource use (resuse)	140	205	0.577327	0.0411713	0.496633	0.658021
		Resource use sensitivity 1 (resuse_sens1)	141	205	0.619653	0.0621216	0.497897	0.741409
		Resource use sensitivity 2 (resuse_sens2)	142	205	0.564256	0.0416644	0.482596	0.645917
		Resource use sensitivity 3 (resuse_sens3)	143	205	0.62715	0.0780556	0.474164	0.780137
		Serious injury (icisssev)	144	205	0.524396	0.0452218	0.435762	0.613029
0-14, males (5)	Included only	Severly injured (sevinj)	145	67	0.605136	0.0739227	0.46025	0.750022
		Severly injured sensitvity 1 (sevinj_sens1)	146	67	0.6	0.0891443	0.42528	0.77472
		Severly injured sensitvity 2 (sevinj_sens2)	147	67	0.589921	0.0759117	0.441137	0.738705
		Severly injured sensitvity 3 (sevinj_sens3)	148	67	0.617034	0.085032	0.450375	0.783694
		Resource use (resuse)	149	67	0.57764	0.0788925	0.423013	0.732266
		Resource use sensitivity 1 (resuse_sens1)	150	67	0.569672	0.175556	0.225589	0.913755
		Resource use sensitivity 2 (resuse_sens2)	151	67	0.56117	0.0813651	0.401698	0.720643
		Resource use sensitivity 3 (resuse_sens3)	152	67	0.638021	0.249888	0.148249	1
		Serious injury (icisssev)	153	67	0.636119	0.0880863	0.463473	0.808765
	Included + Excluded, coding	Severly injured (sevinj)	154	67	0.605136	0.0739227	0.46025	0.750022
		Severly injured sensitvity 1 (sevinj_sens1)	155	67	0.6	0.0891443	0.42528	0.77472
		Severly injured sensitvity 2 (sevinj_sens2)	156	67	0.589921	0.0759117	0.441137	0.738705
		Severly injured sensitvity 3 (sevinj_sens3)	157	67	0.617034	0.085032	0.450375	0.783694
		Resource use (resuse)	158	67	0.57764	0.0788925	0.423013	0.732266
		Resource use sensitivity 1 (resuse_sens1)	159	67	0.569672	0.175556	0.225589	0.913755
		Resource use sensitivity 2 (resuse_sens2)	160	67	0.56117	0.0813651	0.401698	0.720643
		Resource use sensitivity 3 (resuse_sens3)	161	67	0.638021	0.249888	0.148249	1
		Serious injury (icisssev)	162	67	0.636119	0.0880863	0.463473	0.808765
	Included + Excluded, dead and transfer	Severly injured (sevinj)	163	95	0.55164	0.0598567	0.434323	0.668957
		Severly injured sensitvity 1 (sevinj_sens1)	164	95	0.532546	0.0668341	0.401553	0.663538
		Severly injured sensitvity 2 (sevinj_sens2)	165	95	0.539929	0.0602784	0.421786	0.658072
		Severly injured sensitvity 3 (sevinj_sens3)	166	95	0.544727	0.0647599	0.4178	0.671654
		Resource use (resuse)	167	95	0.529896	0.0619704	0.408437	0.651356
		Resource use sensitivity 1 (resuse_sens1)	168	95	0.583333	0.105694	0.376177	0.790489
		Resource use sensitivity 2 (resuse_sens2)	169	95	0.517619	0.0626062	0.394913	0.640325
		Resource use sensitivity 3 (resuse_sens3)	170	95	0.562222	0.1471	0.273912	0.850532
		Serious injury (icisssev)	171	95	0.556052	0.0685925	0.421613	0.69049
	All	Severly injured (sevinj)	172	95	0.55164	0.0598567	0.434323	0.668957
		Severly injured sensitvity 1 (sevinj_sens1)	173	95	0.532546	0.0668341	0.401553	0.663538
		Severly injured sensitvity 2 (sevinj_sens2)	174	95	0.539929	0.0602784	0.421786	0.658072
		Severly injured sensitvity 3 (sevinj_sens3)	175	95	0.544727	0.0647599	0.4178	0.671654
		Resource use (resuse)	176	95	0.529896	0.0619704	0.408437	0.651356
		Resource use sensitivity 1 (resuse_sens1)	177	95	0.583333	0.105694	0.376177	0.790489
		Resource use sensitivity 2 (resuse_sens2)	178	95	0.517619	0.0626062	0.394913	0.640325
		Resource use sensitivity 3 (resuse_sens3)	179	95	0.562222	0.1471	0.273912	0.850532
		Serious injury (icisssev)	180	95	0.556052	0.0685925	0.421613	0.69049
0-14, females (6)	Included only	Severly injured (sevinj)	181	86	0.603893	0.0619884	0.482397	0.725388
		Severly injured sensitvity 1 (sevinj_sens1)	182	86	0.557377	0.0671554	0.425755	0.688999
		Severly injured sensitvity 2 (sevinj_sens2)	183	86	0.581633	0.0625971	0.458945	0.704321
		Severly injured sensitvity 3 (sevinj_sens3)	184	86	0.548051	0.0684401	0.413911	0.682191
		Resource use (resuse)	185	86	0.658033	0.0627438	0.535057	0.781008
		Resource use sensitivity 1 (resuse_sens1)	186	86	0.714286	0.0811381	0.555258	0.873313
		Resource use sensitivity 2 (resuse_sens2)	187	86	0.634073	0.0635506	0.509516	0.758629
		Resource use sensitivity 3 (resuse_sens3)	188	86	0.660643	0.169361	0.328701	0.992584
		Serious injury (icisssev)	189	86	0.518821	0.0696915	0.382228	0.655414
	Included + Excluded, coding	Severly injured (sevinj)	190	88	0.61901	0.060717	0.500007	0.738013
		Severly injured sensitvity 1 (sevinj_sens1)	191	88	0.568548	0.0665917	0.438031	0.699066
		Severly injured sensitvity 2 (sevinj_sens2)	192	88	0.597331	0.0614554	0.476881	0.717782
		Severly injured sensitvity 3 (sevinj_sens3)	193	88	0.560635	0.0679632	0.42743	0.69384
		Resource use (resuse)	194	88	0.677292	0.0605354	0.558645	0.795939
		Resource use sensitivity 1 (resuse_sens1)	195	88	0.744531	0.0794323	0.588847	0.900216
		Resource use sensitivity 2 (resuse_sens2)	196	88	0.654777	0.0615193	0.534201	0.775352
		Resource use sensitivity 3 (resuse_sens3)	197	88	0.739583	0.147108	0.451257	1
		Serious injury (icisssev)	198	88	0.506198	0.0688876	0.371181	0.641216
	Included + Excluded, dead and transfer	Severly injured (sevinj)	199	108	0.572899	0.0558234	0.463487	0.682311
		Severly injured sensitvity 1 (sevinj_sens1)	200	108	0.533689	0.0585947	0.418845	0.648532
		Severly injured sensitvity 2 (sevinj_sens2)	201	108	0.555403	0.0560434	0.44556	0.665246
		Severly injured sensitvity 3 (sevinj_sens3)	202	108	0.532022	0.0589169	0.416547	0.647497
		Resource use (resuse)	203	108	0.598713	0.0565315	0.487913	0.709513
		Resource use sensitivity 1 (resuse_sens1)	204	108	0.62724	0.0787454	0.472902	0.781578
		Resource use sensitivity 2 (resuse_sens2)	205	108	0.581767	0.0573716	0.469321	0.694213
		Resource use sensitivity 3 (resuse_sens3)	206	108	0.628125	0.0991642	0.433767	0.822483
		Serious injury (icisssev)	207	108	0.509495	0.0605584	0.390803	0.628187
	All	Severly injured (sevinj)	208	110	0.584906	0.0550652	0.47698	0.692832
		Severly injured sensitvity 1 (sevinj_sens1)	209	110	0.541118	0.058189	0.42707	0.655167
		Severly injured sensitvity 2 (sevinj_sens2)	210	110	0.567934	0.0553555	0.459439	0.676429
		Severly injured sensitvity 3 (sevinj_sens3)	211	110	0.539985	0.0585454	0.425238	0.654732
		Resource use (resuse)	212	110	0.614321	0.0554267	0.505686	0.722955
		Resource use sensitivity 1 (resuse_sens1)	213	110	0.646609	0.077246	0.49521	0.798008
		Resource use sensitivity 2 (resuse_sens2)	214	110	0.598393	0.0563117	0.488024	0.708762
		Resource use sensitivity 3 (resuse_sens3)	215	110	0.665017	0.0966284	0.475628	0.854405
		Serious injury (icisssev)	216	110	0.498819	0.0599545	0.381311	0.616328
15-64, both sexes (7)	Included only	Severly injured (sevinj)	217	1067	0.619401	0.0170543	0.585975	0.652827
		Severly injured sensitvity 1 (sevinj_sens1)	218	1067	0.659235	0.0186012	0.622777	0.695692
		Severly injured sensitvity 2 (sevinj_sens2)	219	1067	0.619401	0.0170543	0.585975	0.652827
		Severly injured sensitvity 3 (sevinj_sens3)	220	1067	0.665604	0.018553	0.629241	0.701967
		Resource use (resuse)	221	1067	0.604658	0.0170985	0.571146	0.638171
		Resource use sensitivity 1 (resuse_sens1)	222	1067	0.693569	0.0287294	0.63726	0.749877
		Resource use sensitivity 2 (resuse_sens2)	223	1067	0.606329	0.0170789	0.572855	0.639803
		Resource use sensitivity 3 (resuse_sens3)	224	1067	0.670792	0.0684903	0.536553	0.80503
		Serious injury (icisssev)	225	1067	0.660107	0.0187543	0.62335	0.696865
	Included + Excluded, coding	Severly injured (sevinj)	226	1100	0.613003	0.0168912	0.579897	0.64611
		Severly injured sensitvity 1 (sevinj_sens1)	227	1100	0.646776	0.018438	0.610638	0.682913
		Severly injured sensitvity 2 (sevinj_sens2)	228	1100	0.614738	0.0168711	0.581671	0.647804
		Severly injured sensitvity 3 (sevinj_sens3)	229	1100	0.659163	0.0184492	0.623003	0.695322
		Resource use (resuse)	230	1100	0.601551	0.016876	0.568474	0.634627
		Resource use sensitivity 1 (resuse_sens1)	231	1100	0.673949	0.0279777	0.619114	0.728785
		Resource use sensitivity 2 (resuse_sens2)	232	1100	0.604962	0.016835	0.571966	0.637957
		Resource use sensitivity 3 (resuse_sens3)	233	1100	0.681381	0.0666149	0.550819	0.811944
		Serious injury (icisssev)	234	1100	0.65382	0.0186472	0.617272	0.690368
	Included + Excluded, dead and transfer	Severly injured (sevinj)	235	1277	0.578959	0.0160378	0.547526	0.610393
		Severly injured sensitvity 1 (sevinj_sens1)	236	1277	0.595893	0.0179279	0.560755	0.631031
		Severly injured sensitvity 2 (sevinj_sens2)	237	1277	0.579673	0.0160376	0.54824	0.611106
		Severly injured sensitvity 3 (sevinj_sens3)	238	1277	0.602254	0.0178082	0.56735	0.637157
		Resource use (resuse)	239	1277	0.565709	0.0159412	0.534464	0.596953
		Resource use sensitivity 1 (resuse_sens1)	240	1277	0.625645	0.0280524	0.570663	0.680627
		Resource use sensitivity 2 (resuse_sens2)	241	1277	0.566979	0.0159332	0.535751	0.598208
		Resource use sensitivity 3 (resuse_sens3)	242	1277	0.501591	0.0497817	0.404021	0.599162
		Serious injury (icisssev)	243	1277	0.599432	0.0180978	0.56396	0.634902
	All	Severly injured (sevinj)	244	1310	0.574821	0.0158793	0.543698	0.605944
		Severly injured sensitvity 1 (sevinj_sens1)	245	1310	0.590194	0.017602	0.555695	0.624694
		Severly injured sensitvity 2 (sevinj_sens2)	246	1310	0.576936	0.0158711	0.54583	0.608043
		Severly injured sensitvity 3 (sevinj_sens3)	247	1310	0.598179	0.017638	0.563609	0.632749
		Resource use (resuse)	248	1310	0.56444	0.0157494	0.533572	0.595309
		Resource use sensitivity 1 (resuse_sens1)	249	1310	0.622126	0.0266358	0.569921	0.674332
		Resource use sensitivity 2 (resuse_sens2)	250	1310	0.567144	0.0157318	0.53631	0.597977
		Resource use sensitivity 3 (resuse_sens3)	251	1310	0.509129	0.0495682	0.411977	0.606281
		Serious injury (icisssev)	252	1310	0.595532	0.0179208	0.560408	0.630656
15-64, males (8)	Included only	Severly injured (sevinj)	253	532	0.635939	0.0240309	0.588839	0.683039
		Severly injured sensitvity 1 (sevinj_sens1)	254	532	0.6664	0.0248865	0.617623	0.715176
		Severly injured sensitvity 2 (sevinj_sens2)	255	532	0.635939	0.0240309	0.588839	0.683039
		Severly injured sensitvity 3 (sevinj_sens3)	256	532	0.674667	0.0248497	0.625963	0.723372
		Resource use (resuse)	257	532	0.620246	0.0240136	0.57318	0.667312
		Resource use sensitivity 1 (resuse_sens1)	258	532	0.685917	0.0382229	0.611001	0.760832
		Resource use sensitivity 2 (resuse_sens2)	259	532	0.620246	0.0240136	0.57318	0.667312
		Resource use sensitivity 3 (resuse_sens3)	260	532	0.686307	0.10656	0.477454	0.89516
		Serious injury (icisssev)	261	532	0.674192	0.0248088	0.625567	0.722816
	Included + Excluded, coding	Severly injured (sevinj)	262	547	0.630395	0.0238583	0.583633	0.677156
		Severly injured sensitvity 1 (sevinj_sens1)	263	547	0.65261	0.0248902	0.603827	0.701394
		Severly injured sensitvity 2 (sevinj_sens2)	264	547	0.630395	0.0238583	0.583633	0.677156
		Severly injured sensitvity 3 (sevinj_sens3)	265	547	0.66327	0.0250423	0.614188	0.712352
		Resource use (resuse)	266	547	0.61951	0.0236988	0.573061	0.665958
		Resource use sensitivity 1 (resuse_sens1)	267	547	0.668491	0.0368881	0.596192	0.74079
		Resource use sensitivity 2 (resuse_sens2)	268	547	0.61951	0.0236988	0.573061	0.665958
		Resource use sensitivity 3 (resuse_sens3)	269	547	0.685065	0.106079	0.477153	0.892977
		Serious injury (icisssev)	270	547	0.662544	0.025032	0.613482	0.711606
	Included + Excluded, dead and transfer	Severly injured (sevinj)	271	645	0.58899	0.0226357	0.544625	0.633355
		Severly injured sensitvity 1 (sevinj_sens1)	272	645	0.588883	0.0243453	0.541167	0.636599
		Severly injured sensitvity 2 (sevinj_sens2)	273	645	0.590392	0.0226381	0.546022	0.634762
		Severly injured sensitvity 3 (sevinj_sens3)	274	645	0.596613	0.0242268	0.549129	0.644097
		Resource use (resuse)	275	645	0.570128	0.0224367	0.526153	0.614103
		Resource use sensitivity 1 (resuse_sens1)	276	645	0.5995	0.0355457	0.529832	0.669169
		Resource use sensitivity 2 (resuse_sens2)	277	645	0.570061	0.0224345	0.526091	0.614032
		Resource use sensitivity 3 (resuse_sens3)	278	645	0.511037	0.0651396	0.383366	0.638709
		Serious injury (icisssev)	279	645	0.597176	0.0246367	0.548889	0.645463
	All	Severly injured (sevinj)	280	660	0.586004	0.0224541	0.541995	0.630013
		Severly injured sensitvity 1 (sevinj_sens1)	281	660	0.582704	0.0239803	0.535703	0.629704
		Severly injured sensitvity 2 (sevinj_sens2)	282	660	0.58738	0.0224577	0.543363	0.631396
		Severly injured sensitvity 3 (sevinj_sens3)	283	660	0.588723	0.0241195	0.541449	0.635996
		Resource use (resuse)	284	660	0.571152	0.0221792	0.527682	0.614622
		Resource use sensitivity 1 (resuse_sens1)	285	660	0.596843	0.0339793	0.530245	0.663441
		Resource use sensitivity 2 (resuse_sens2)	286	660	0.57112	0.0221769	0.527654	0.614586
		Resource use sensitivity 3 (resuse_sens3)	287	660	0.509696	0.0649179	0.382459	0.636933
		Serious injury (icisssev)	288	660	0.589092	0.0245323	0.541009	0.637174
15-64, females (9)	Included only	Severly injured (sevinj)	289	535	0.602725	0.02427	0.555157	0.650294
		Severly injured sensitvity 1 (sevinj_sens1)	290	535	0.651461	0.0278953	0.596787	0.706135
		Severly injured sensitvity 2 (sevinj_sens2)	291	535	0.602725	0.02427	0.555157	0.650294
		Severly injured sensitvity 3 (sevinj_sens3)	292	535	0.656081	0.0277012	0.601787	0.710374
		Resource use (resuse)	293	535	0.589421	0.0243708	0.541655	0.637187
		Resource use sensitivity 1 (resuse_sens1)	294	535	0.704429	0.0442019	0.617795	0.791063
		Resource use sensitivity 2 (resuse_sens2)	295	535	0.592755	0.0243224	0.545084	0.640426
		Resource use sensitivity 3 (resuse_sens3)	296	535	0.660612	0.0913369	0.481594	0.839629
		Serious injury (icisssev)	297	535	0.645534	0.0282898	0.590087	0.700981
	Included + Excluded, coding	Severly injured (sevinj)	298	553	0.595843	0.0239811	0.548841	0.642845
		Severly injured sensitvity 1 (sevinj_sens1)	299	553	0.640952	0.0273988	0.587252	0.694653
		Severly injured sensitvity 2 (sevinj_sens2)	300	553	0.599313	0.0239326	0.552406	0.64622
		Severly injured sensitvity 3 (sevinj_sens3)	301	553	0.655057	0.0271962	0.601754	0.708361
		Resource use (resuse)	302	553	0.584053	0.0240448	0.536926	0.63118
		Resource use sensitivity 1 (resuse_sens1)	303	553	0.681652	0.0433545	0.596679	0.766625
		Resource use sensitivity 2 (resuse_sens2)	304	553	0.590838	0.0239465	0.543904	0.637772
		Resource use sensitivity 3 (resuse_sens3)	305	553	0.678191	0.0876153	0.506468	0.849914
		Serious injury (icisssev)	306	553	0.645199	0.0277512	0.590808	0.69959
	Included + Excluded, dead and transfer	Severly injured (sevinj)	307	631	0.567189	0.0228237	0.522455	0.611923
		Severly injured sensitvity 1 (sevinj_sens1)	308	631	0.602321	0.0267148	0.549961	0.654681
		Severly injured sensitvity 2 (sevinj_sens2)	309	631	0.567189	0.0228237	0.522455	0.611923
		Severly injured sensitvity 3 (sevinj_sens3)	310	631	0.607239	0.0264643	0.555369	0.659108
		Resource use (resuse)	311	631	0.559964	0.0227347	0.515405	0.604523
		Resource use sensitivity 1 (resuse_sens1)	312	631	0.668984	0.0461531	0.578526	0.759442
		Resource use sensitivity 2 (resuse_sens2)	313	631	0.562611	0.0227136	0.518093	0.607129
		Resource use sensitivity 3 (resuse_sens3)	314	631	0.490096	0.0770997	0.338983	0.641208
		Serious injury (icisssev)	315	631	0.600712	0.0268476	0.548092	0.653333
	All	Severly injured (sevinj)	316	649	0.562235	0.0225533	0.518031	0.606439
		Severly injured sensitvity 1 (sevinj_sens1)	317	649	0.597504	0.0261093	0.546331	0.648677
		Severly injured sensitvity 2 (sevinj_sens2)	318	649	0.565142	0.0225327	0.520979	0.609305
		Severly injured sensitvity 3 (sevinj_sens3)	319	649	0.607632	0.0260216	0.556631	0.658633
		Resource use (resuse)	320	649	0.556513	0.0224451	0.512521	0.600504
		Resource use sensitivity 1 (resuse_sens1)	321	649	0.660306	0.04323	0.575577	0.745035
		Resource use sensitivity 2 (resuse_sens2)	322	649	0.562033	0.0223994	0.518131	0.605935
		Resource use sensitivity 3 (resuse_sens3)	323	649	0.5076	0.0764095	0.35784	0.65736
		Serious injury (icisssev)	324	649	0.60164	0.0263894	0.549917	0.653362
≥65, both sexes (10)	Included only	Severly injured (sevinj)	325	276	0.643803	0.0330036	0.579117	0.708488
		Severly injured sensitvity 1 (sevinj_sens1)	326	276	0.615026	0.0356368	0.545179	0.684873
		Severly injured sensitvity 2 (sevinj_sens2)	327	276	0.643803	0.0330036	0.579117	0.708488
		Severly injured sensitvity 3 (sevinj_sens3)	328	276	0.627843	0.0353485	0.558561	0.697125
		Resource use (resuse)	329	276	0.63316	0.0333157	0.567863	0.698457
		Resource use sensitivity 1 (resuse_sens1)	330	276	0.733459	0.0877778	0.561417	0.9055
		Resource use sensitivity 2 (resuse_sens2)	331	276	0.63316	0.0333157	0.567863	0.698457
		Resource use sensitivity 3 (resuse_sens3)	332	276	0.962037	0.029231	0.904745	1
		Serious injury (icisssev)	333	276	0.590807	0.0357634	0.520712	0.660902
	Included + Excluded, coding	Severly injured (sevinj)	334	293	0.650797	0.0319307	0.588214	0.71338
		Severly injured sensitvity 1 (sevinj_sens1)	335	293	0.639001	0.0337993	0.572756	0.705247
		Severly injured sensitvity 2 (sevinj_sens2)	336	293	0.650797	0.0319307	0.588214	0.71338
		Severly injured sensitvity 3 (sevinj_sens3)	337	293	0.629129	0.0344875	0.561535	0.696724
		Resource use (resuse)	338	293	0.645074	0.031941	0.582471	0.707677
		Resource use sensitivity 1 (resuse_sens1)	339	293	0.777276	0.0559255	0.667664	0.886888
		Resource use sensitivity 2 (resuse_sens2)	340	293	0.639608	0.0320851	0.576722	0.702493
		Resource use sensitivity 3 (resuse_sens3)	341	293	0.943463	0.0248863	0.894687	0.992239
		Serious injury (icisssev)	342	293	0.583016	0.0351613	0.514101	0.651931
	Included + Excluded, dead and transfer	Severly injured (sevinj)	343	346	0.604754	0.0304801	0.545014	0.664494
		Severly injured sensitvity 1 (sevinj_sens1)	344	346	0.562922	0.0343694	0.495559	0.630285
		Severly injured sensitvity 2 (sevinj_sens2)	345	346	0.604754	0.0304801	0.545014	0.664494
		Severly injured sensitvity 3 (sevinj_sens3)	346	346	0.567396	0.0343104	0.500149	0.634643
		Resource use (resuse)	347	346	0.577161	0.0307228	0.516946	0.637377
		Resource use sensitivity 1 (resuse_sens1)	348	346	0.457397	0.0765761	0.30731	0.607483
		Resource use sensitivity 2 (resuse_sens2)	349	346	0.577161	0.0307228	0.516946	0.637377
		Resource use sensitivity 3 (resuse_sens3)	350	346	0.538163	0.102887	0.336508	0.739817
		Serious injury (icisssev)	351	346	0.541862	0.0347623	0.473729	0.609994
	All	Severly injured (sevinj)	352	363	0.612715	0.0296757	0.554551	0.670878
		Severly injured sensitvity 1 (sevinj_sens1)	353	363	0.588024	0.0329974	0.52335	0.652697
		Severly injured sensitvity 2 (sevinj_sens2)	354	363	0.612715	0.0296757	0.554551	0.670878
		Severly injured sensitvity 3 (sevinj_sens3)	355	363	0.570374	0.033606	0.504508	0.636241
		Resource use (resuse)	356	363	0.590615	0.029765	0.532277	0.648953
		Resource use sensitivity 1 (resuse_sens1)	357	363	0.565049	0.0654697	0.436731	0.693367
		Resource use sensitivity 2 (resuse_sens2)	358	363	0.585928	0.0298327	0.527456	0.644398
		Resource use sensitivity 3 (resuse_sens3)	359	363	0.61363	0.0898078	0.43761	0.78965
		Serious injury (icisssev)	360	363	0.536502	0.0341917	0.469488	0.603517
≥65, males (11)	Included only	Severly injured (sevinj)	361	142	0.588393	0.0477856	0.494735	0.682051
		Severly injured sensitvity 1 (sevinj_sens1)	362	142	0.598795	0.0512939	0.49826	0.699329
		Severly injured sensitvity 2 (sevinj_sens2)	363	142	0.588393	0.0477856	0.494735	0.682051
		Severly injured sensitvity 3 (sevinj_sens3)	364	142	0.607336	0.0506641	0.508036	0.706636
		Resource use (resuse)	365	142	0.565657	0.0485228	0.470554	0.660759
		Resource use sensitivity 1 (resuse_sens1)	366	142	0.687831	0.110949	0.470375	0.905286
		Resource use sensitivity 2 (resuse_sens2)	367	142	0.565657	0.0485228	0.470554	0.660759
		Resource use sensitivity 3 (resuse_sens3)	368	142	0.922062	0.0651981	0.794276	1
		Serious injury (icisssev)	369	142	0.565632	0.0512118	0.465259	0.666005
	Included + Excluded, coding	Severly injured (sevinj)	370	150	0.602596	0.0461882	0.512069	0.693123
		Severly injured sensitvity 1 (sevinj_sens1)	371	150	0.63448	0.0485159	0.53939	0.729569
		Severly injured sensitvity 2 (sevinj_sens2)	372	150	0.602596	0.0461882	0.512069	0.693123
		Severly injured sensitvity 3 (sevinj_sens3)	373	150	0.60499	0.0498641	0.507258	0.702721
		Resource use (resuse)	374	150	0.590741	0.0467169	0.499177	0.682304
		Resource use sensitivity 1 (resuse_sens1)	375	150	0.762077	0.0753905	0.614315	0.90984
		Resource use sensitivity 2 (resuse_sens2)	376	150	0.579717	0.0469566	0.487684	0.67175
		Resource use sensitivity 3 (resuse_sens3)	377	150	0.933103	0.040982	0.85278	1
		Serious injury (icisssev)	378	150	0.566277	0.0504927	0.467313	0.665241
	Included + Excluded, dead and transfer	Severly injured (sevinj)	379	173	0.570683	0.0438682	0.484703	0.656663
		Severly injured sensitvity 1 (sevinj_sens1)	380	173	0.554177	0.0494579	0.457241	0.651112
		Severly injured sensitvity 2 (sevinj_sens2)	381	173	0.570683	0.0438682	0.484703	0.656663
		Severly injured sensitvity 3 (sevinj_sens3)	382	173	0.559911	0.0497499	0.462403	0.657419
		Resource use (resuse)	383	173	0.540154	0.0439833	0.453948	0.62636
		Resource use sensitivity 1 (resuse_sens1)	384	173	0.518633	0.10638	0.310133	0.727134
		Resource use sensitivity 2 (resuse_sens2)	385	173	0.540154	0.0439833	0.453948	0.62636
		Resource use sensitivity 3 (resuse_sens3)	386	173	0.709319	0.229775	0.258969	1
		Serious injury (icisssev)	387	173	0.522809	0.0498871	0.425032	0.620585
	All	Severly injured (sevinj)	388	181	0.582659	0.0426765	0.499015	0.666304
		Severly injured sensitvity 1 (sevinj_sens1)	389	181	0.58952	0.0473653	0.496686	0.682354
		Severly injured sensitvity 2 (sevinj_sens2)	390	181	0.582659	0.0426765	0.499015	0.666304
		Severly injured sensitvity 3 (sevinj_sens3)	391	181	0.560307	0.0488753	0.464513	0.656101
		Resource use (resuse)	392	181	0.561053	0.0427902	0.477186	0.64492
		Resource use sensitivity 1 (resuse_sens1)	393	181	0.623924	0.087532	0.452364	0.795484
		Resource use sensitivity 2 (resuse_sens2)	394	181	0.551573	0.0429047	0.467482	0.635665
		Resource use sensitivity 3 (resuse_sens3)	395	181	0.791905	0.155198	0.487723	1
		Serious injury (icisssev)	396	181	0.52549	0.0491035	0.429249	0.621731
≥65, females (12)	Included only	Severly injured (sevinj)	397	134	0.695187	0.0453767	0.60625	0.784124
		Severly injured sensitvity 1 (sevinj_sens1)	398	134	0.628118	0.0500633	0.529996	0.72624
		Severly injured sensitvity 2 (sevinj_sens2)	399	134	0.695187	0.0453767	0.60625	0.784124
		Severly injured sensitvity 3 (sevinj_sens3)	400	134	0.644469	0.0497787	0.546905	0.742034
		Resource use (resuse)	401	134	0.694254	0.0457238	0.604637	0.783871
		Resource use sensitivity 1 (resuse_sens1)	402	134	0.830789	0.158519	0.520098	1
		Resource use sensitivity 2 (resuse_sens2)	403	134	0.694254	0.0457238	0.604637	0.783871
		Resource use sensitivity 3 (resuse_sens3)	404	134	0.997456	0.0035985	0.990402	1
		Serious injury (icisssev)	405	134	0.611544	0.0502376	0.51308	0.710008
	Included + Excluded, coding	Severly injured (sevinj)	406	143	0.69589	0.0440514	0.609551	0.78223
		Severly injured sensitvity 1 (sevinj_sens1)	407	143	0.641869	0.0476525	0.548472	0.735266
		Severly injured sensitvity 2 (sevinj_sens2)	408	143	0.69589	0.0440514	0.609551	0.78223
		Severly injured sensitvity 3 (sevinj_sens3)	409	143	0.651134	0.0480942	0.556871	0.745397
		Resource use (resuse)	410	143	0.695437	0.0439826	0.609232	0.781641
		Resource use sensitivity 1 (resuse_sens1)	411	143	0.800945	0.0910478	0.622495	0.979396
		Resource use sensitivity 2 (resuse_sens2)	412	143	0.695437	0.0439826	0.609232	0.781641
		Resource use sensitivity 3 (resuse_sens3)	413	143	0.956522	0.0330885	0.891669	1
		Serious injury (icisssev)	414	143	0.596825	0.0493924	0.500018	0.693633
	Included + Excluded, dead and transfer	Severly injured (sevinj)	415	173	0.637019	0.0423686	0.553978	0.72006
		Severly injured sensitvity 1 (sevinj_sens1)	416	173	0.57175	0.0479461	0.477777	0.665723
		Severly injured sensitvity 2 (sevinj_sens2)	417	173	0.637019	0.0423686	0.553978	0.72006
		Severly injured sensitvity 3 (sevinj_sens3)	418	173	0.576367	0.0475112	0.483247	0.669487
		Resource use (resuse)	419	173	0.611833	0.0430264	0.527503	0.696164
		Resource use sensitivity 1 (resuse_sens1)	420	173	0.393378	0.110595	0.176616	0.61014
		Resource use sensitivity 2 (resuse_sens2)	421	173	0.611833	0.0430264	0.527503	0.696164
		Resource use sensitivity 3 (resuse_sens3)	422	173	0.49146	0.114162	0.267707	0.715213
		Serious injury (icisssev)	423	173	0.560339	0.0485002	0.46528	0.655397
	All	Severly injured (sevinj)	424	182	0.64222	0.0412863	0.5613	0.72314
		Severly injured sensitvity 1 (sevinj_sens1)	425	182	0.58713	0.0461655	0.496648	0.677613
		Severly injured sensitvity 2 (sevinj_sens2)	426	182	0.64222	0.0412863	0.5613	0.72314
		Severly injured sensitvity 3 (sevinj_sens3)	427	182	0.582538	0.0464403	0.491516	0.673559
		Resource use (resuse)	428	182	0.619971	0.04162	0.538397	0.701545
		Resource use sensitivity 1 (resuse_sens1)	429	182	0.500599	0.0979396	0.308641	0.692557
		Resource use sensitivity 2 (resuse_sens2)	430	182	0.619971	0.04162	0.538397	0.701545
		Resource use sensitivity 3 (resuse_sens3)	431	182	0.548895	0.105651	0.341822	0.755967
		Serious injury (icisssev)	432	182	0.547794	0.0478061	0.454096	0.641492
